# Supplementary material for: Disrupted Lymph Node and Splenic Stroma in Mice with Induced Inflammatory Melanomas Is Associated with Impaired Recruitment of T and Dendritic Cells
Source: PubMed Central journal article supplement (PMC3141075; doi:10.1371/journal.pone.0022639), 2011-07-21
Supplement: pone.0022639.s003.pdf [file pone.0022639.s003.pdf]

**A**

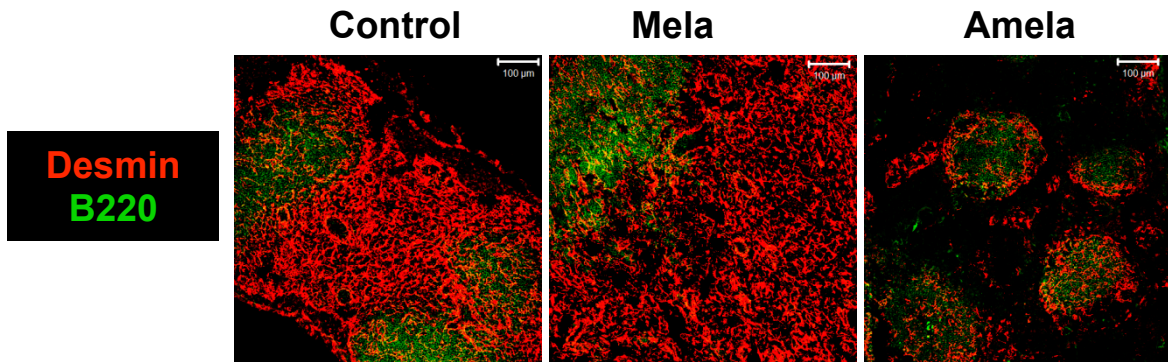

**B**

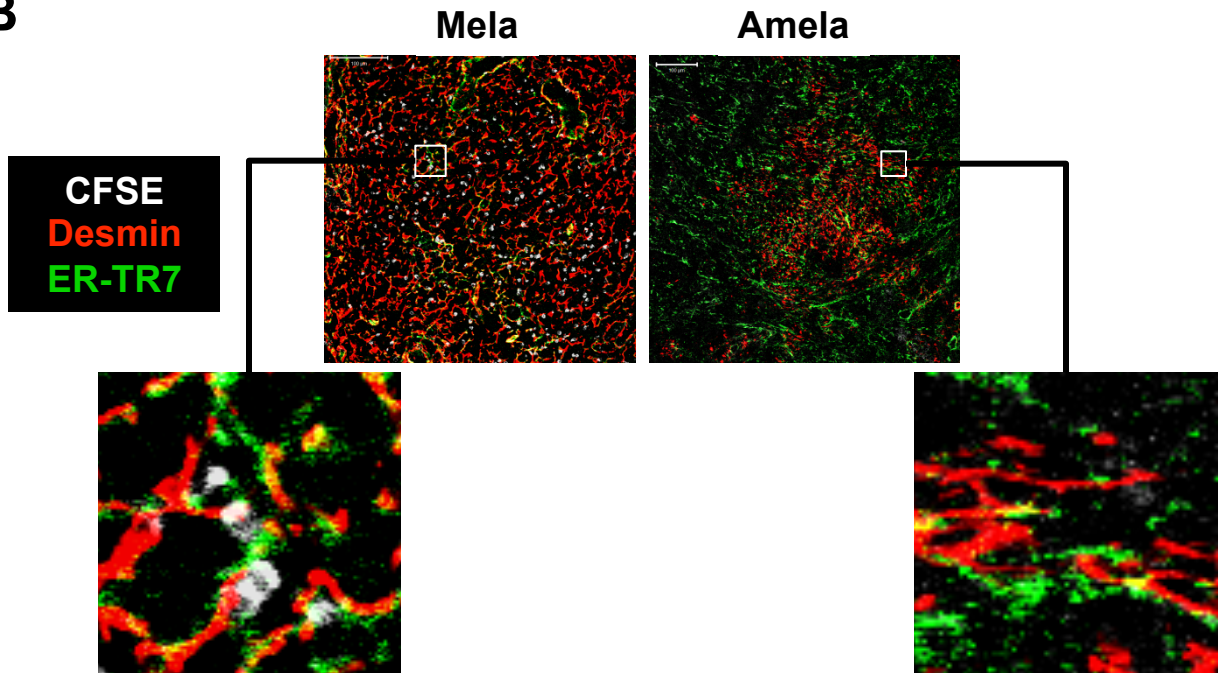

Supplemental figure 3
