# Supplementary material for: Disrupted Lymph Node and Splenic Stroma in Mice with Induced Inflammatory Melanomas Is Associated with Impaired Recruitment of T and Dendritic Cells
Source: PubMed Central journal article supplement (PMC3141075; doi:10.1371/journal.pone.0022639), 2011-07-21
Supplement: pone.0022639.s007.pdf [file pone.0022639.s007.pdf]

**A**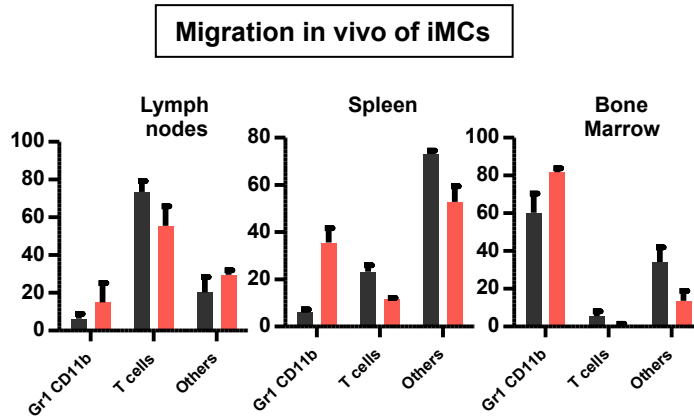

Recipient mice:  
**Naïve**  
**Amela-bearing**

**B**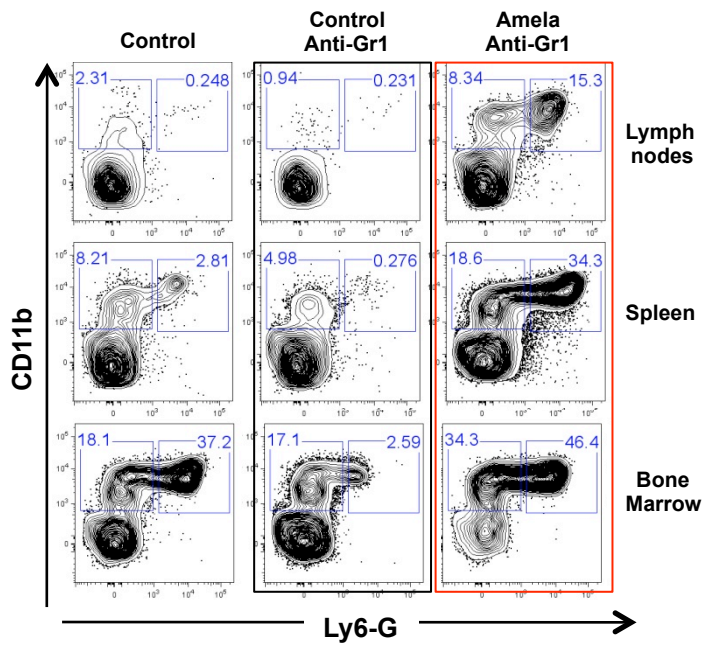

Treated mice:  
**Naïve**  
**Amela-bearing**

Supplemental figure 7
